# Supplementary material for: The effects of yoga compared to active and inactive controls on physical function and health related quality of life in older adults- systematic review and meta-analysis of randomised controlled trials
Source: PubMed Central journal article supplement (PMC6451238; doi:10.1186/s12966-019-0789-2), 2019-04-05
Supplement: 12966_2019_789_MOESM7_ESM.pdf [file 12966_2019_789_MOESM7_ESM.pdf]

## Additional file 7. Cluster randomisation adjustment results- Forest plots and homogeneity data

### Cluster randomisation adjustment analysis 1: Comparing yoga and inactive controls for physical function outcomes

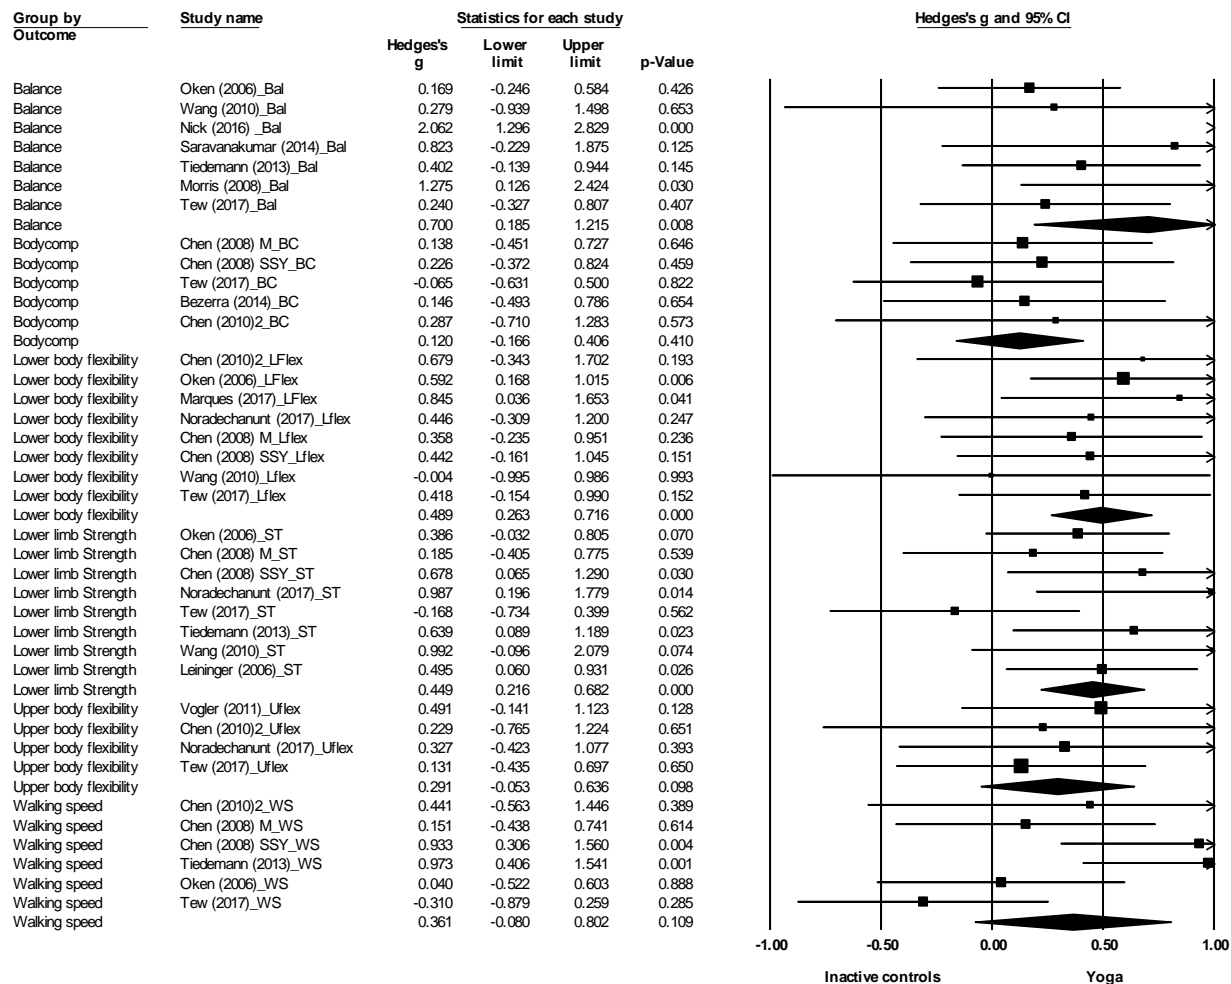

Bal: Balance; M: Yoga group with meditation; SSY: Short Silver Yoga; BC: Body composition; Lflex: Lower body flexibility; ST: Strength (Lower limb); Uflex: Upper body flexibility; WS: Walking speed

**Heterogeneity data**

| <b>Outcome</b>         | <b>I-squared</b> | <b>P value</b> |
|------------------------|------------------|----------------|
| Balance                | 72.15            | 0.001          |
| Body composition       | 0                | 0.96           |
| Lower body flexibility | 0                | 0.94           |
| Lower limb strength    | 23.69            | 0.24           |
| Upper body flexibility | 0                | 0.87           |
| Walking speed          | 66.13            | 0.01           |

## Cluster randomisation adjustment analysis 2: Comparing yoga and inactive controls for HRQoL outcomes

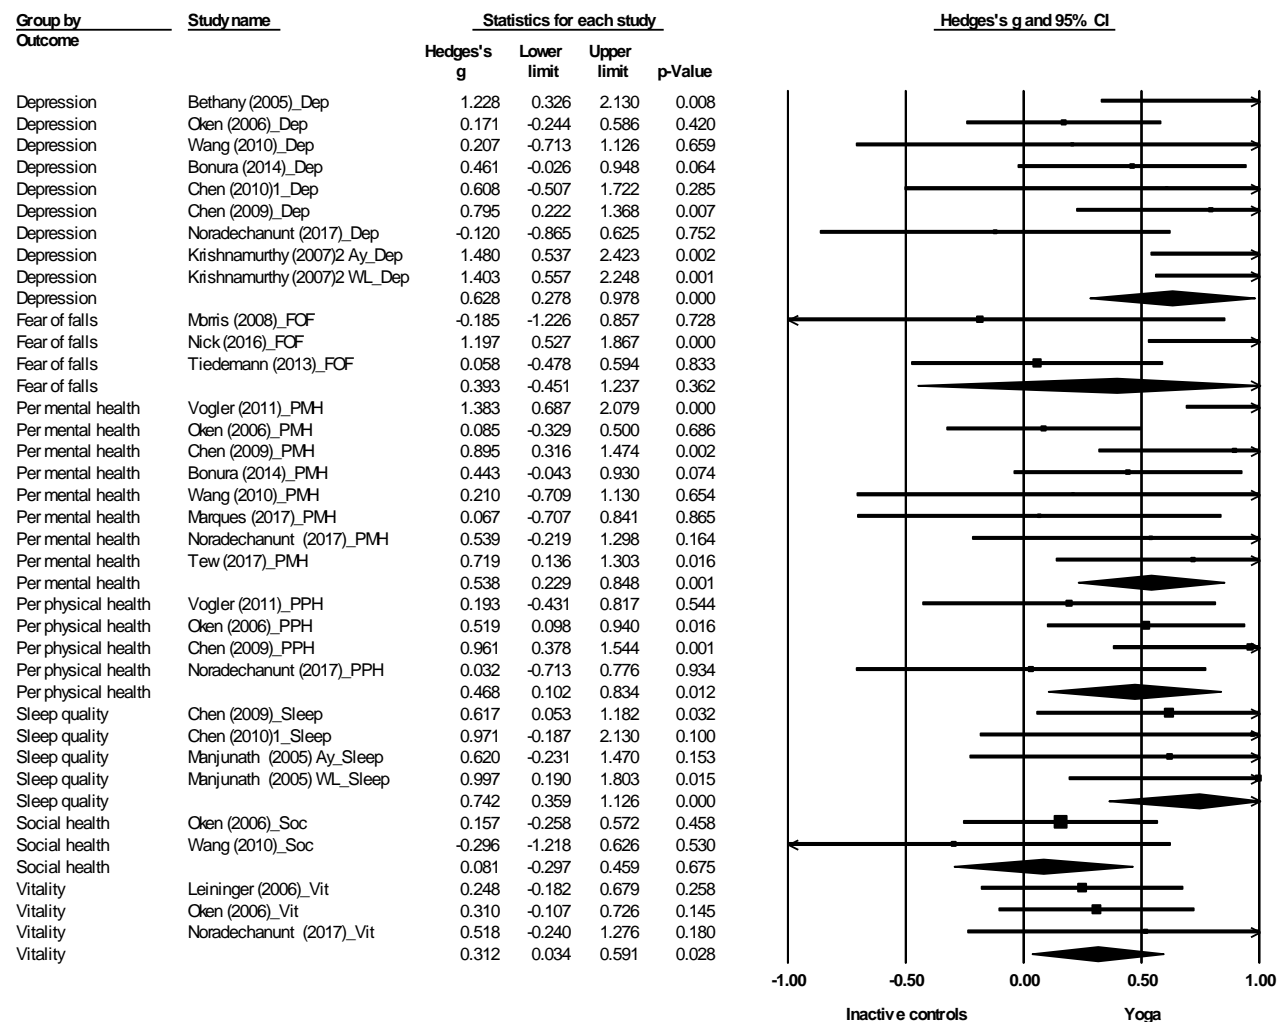

Dep: Depression; FOF: Fear of falls; Per mental health/PMH: Perceived mental health; Per physical health/PPH: Perceived physical health; Sleep: Sleep quality; Soc: Social health; Vit: Vitality; Ay: Ayurveda (herbal preparation); WL: Wait-list control

**Heterogeneity data**

| <b>Outcome</b>            | <b>I-squared</b> | <b>P value</b> |
|---------------------------|------------------|----------------|
| Depression                | 54.25            | 0.03           |
| Fear of falls             | 75.64            | 0.02           |
| Perceived mental health   | 50.03            | 0.05           |
| Perceived physical health | 38.17            | 0.18           |
| Sleep quality             | 0                | 0.85           |
| Social health             | 0                | 0.38           |
| Vitality                  | 0                | 0.83           |
